# Supplementary material
Source: PubMed Central journal article supplement (PMC4119573)
Supplement: NIHMS605481-supplement-1.pdf [file NIHMS605481-supplement-1.pdf]

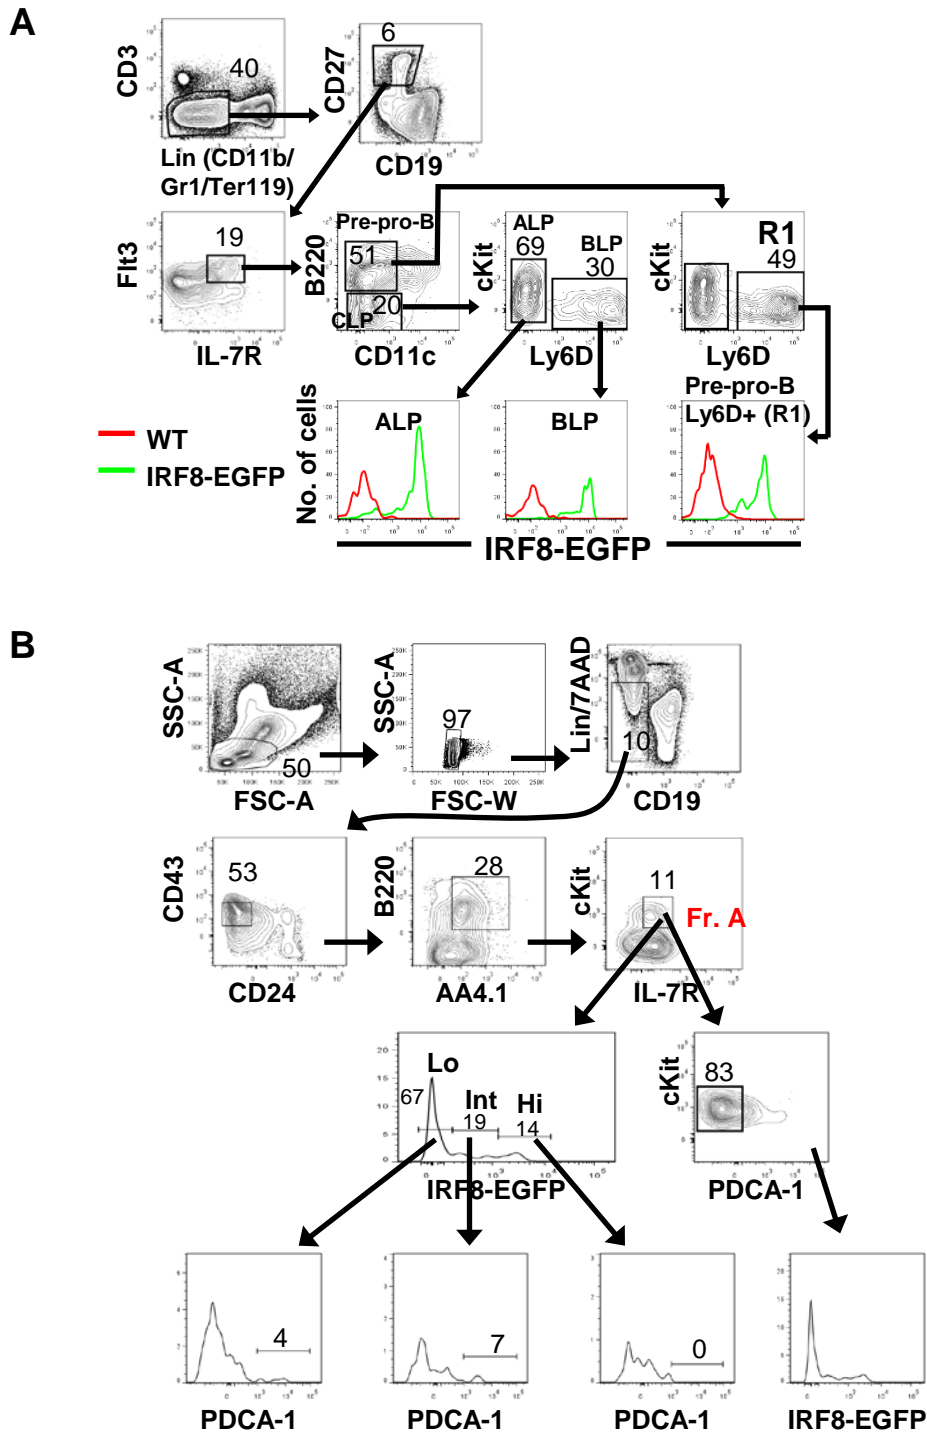

**Supplemental Fig. 1.** Analysis of early B cell populations using the Weissman nomenclature (A) or the modified Hardy nomenclature (B). The BM cells were stained and analyzed by FACS. The numbers are percentages of cells falling in each gate. The lineage panel (Lin) contains anti-CD3, CD11b, Gr-1, Ly6C, DX5, Ter119 Abs. The overlays are expression of IRF8-EGFP over WT controls. Data are representative of three independent experiments.

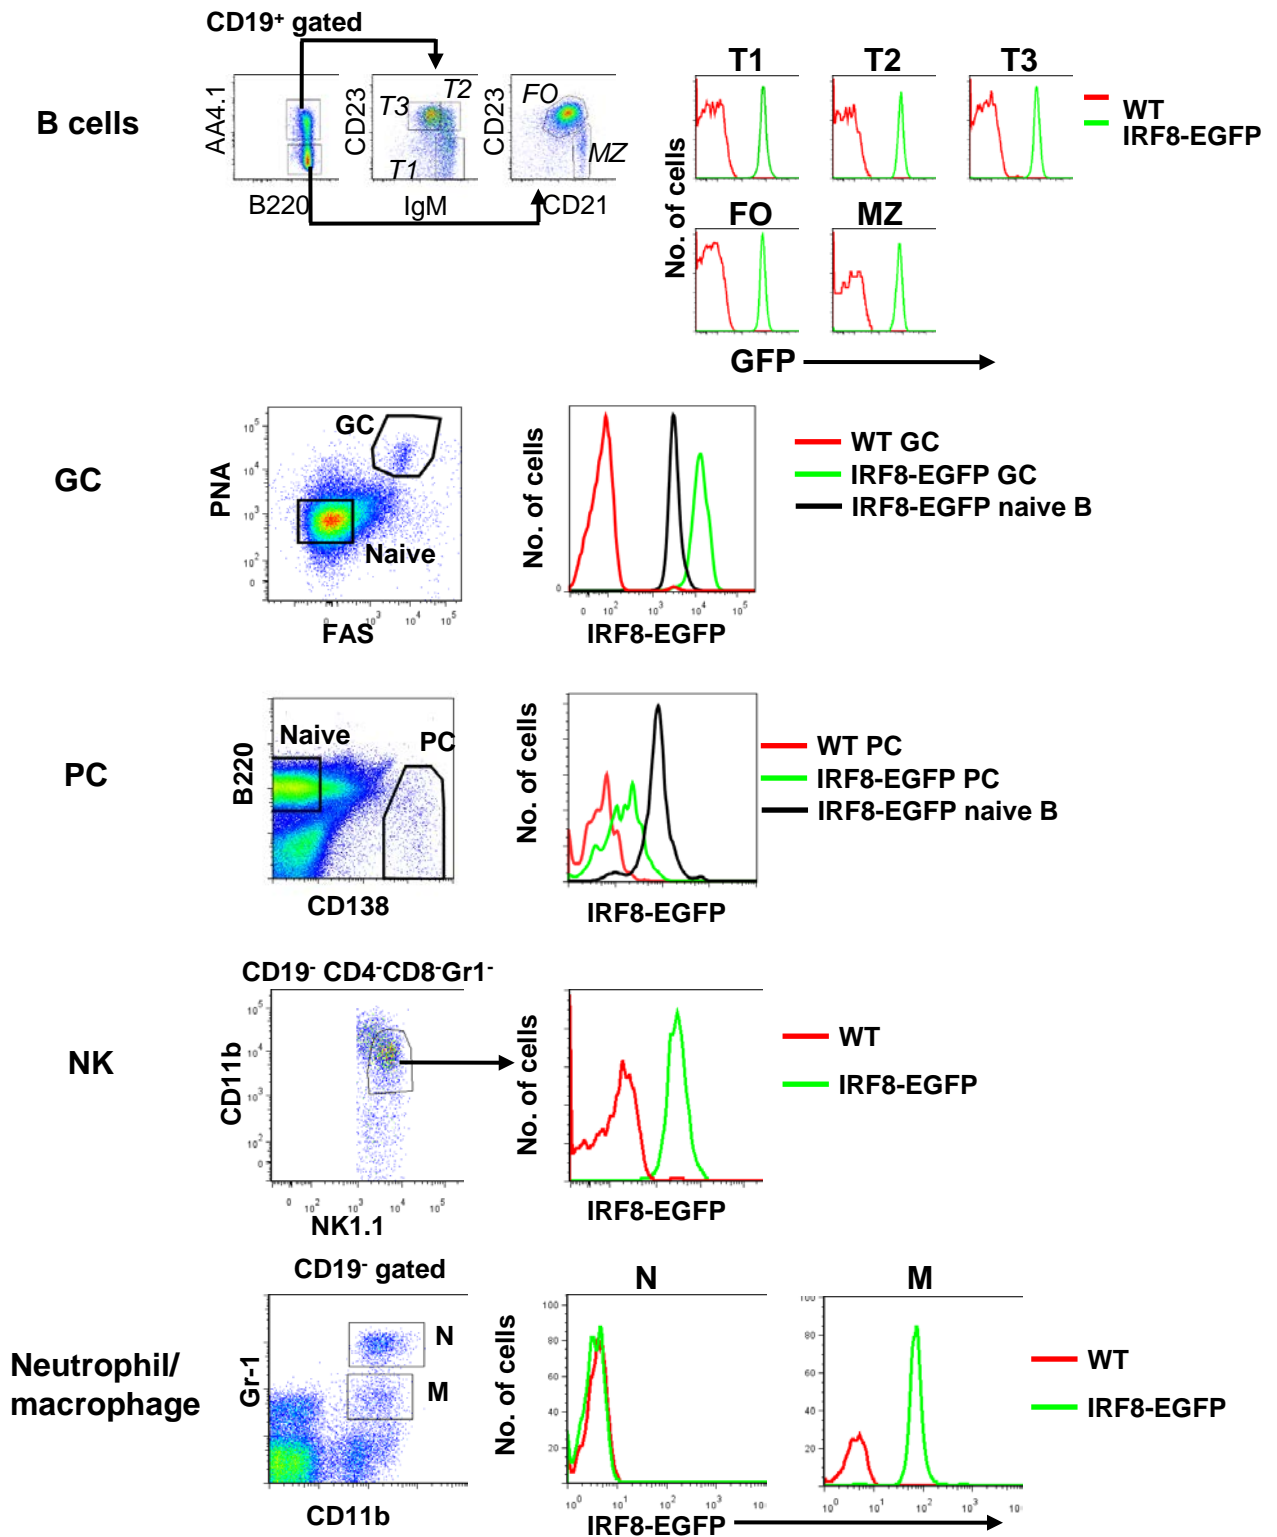

**Supplemental Fig. 2.** IRF8-EGFP expression in splenic B cell subsets, GCs, PCs, NK and neutrophils/macrophages. Splenocytes of WT and IRF8-EGFP mice were stained and analyzed by flow cytometry. The dot plot showed gating schemes used to define specific populations. The overlays (right panels) are expression of IRF8-EGFP over WT controls. Data are representative of more than five independent experiments. Note that GC and PC analysis was done with mice immunized with NP-KLH/alum for 8 days.

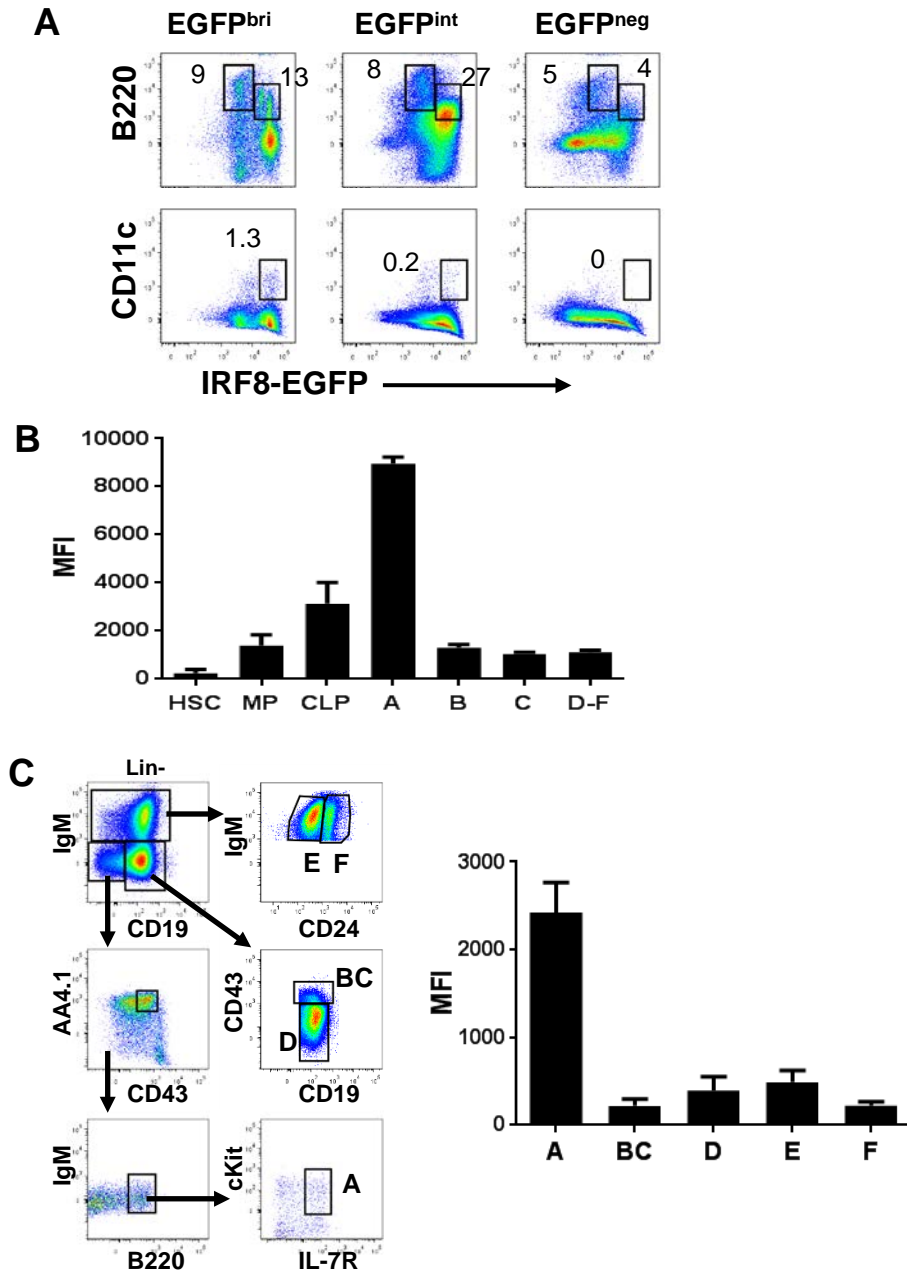

**Supplemental Fig. 3.** Evaluation of IRF8-EGFP (A and B) or IRF8 (C) expression in early B cells. (A) IRF8-EGFP<sup>lo/-</sup> pre-pro-B cells become IRF8-EGFP<sup>+</sup> cells in vitro. BM pre-pro-B cells were sort-purified for EGFP<sup>lo/-</sup>, EGFP<sup>int</sup> and EGFP<sup>bri</sup> as shown in Fig. 5A and were cultured with IL-7, Flt3L, SCF, and IL-15 for 5 days. The cells were then analyzed by flow cytometry. The numbers are percentages of cells falling in each gate. Data are representative of three independent experiments with similar results. (B) BM B cell subsets were defined as depicted in Fig. 2 and Fig. 4. The HSC included both LT- and ST-HSCs. The MP included GMPs, CMPs and MEPs. MFI are absolute values excluding background values obtained from a wild-type control mouse. (C) FACS analysis of intracellular IRF8 protein expression in B6 BM B cells. BM cells were pre-purified with biotin-labeled antibodies against Gr-1, CD11b, Ter119, CD3, Ly6C and Dyna beads. The cells were then stained with antibodies as indicated, followed by fixation, permeabilization and intracellular staining with an anti-IRF8 Ab (C-19x, Santa Cruz) and an anti-goat secondary antibody. Left panel, gating schemes used for defining each B cell subsets. Right panel, MFI are absolute values excluding background which was determined from an IRF8<sup>-/-</sup> sample. Error bars are of 3 mice. Data represent four independent experiments.

**Supplemental Table 1. Antibodies for FACS analysis**

| <b>Antibodies</b> | <b>Clone</b>    | <b>Fluorochrome</b>                                                | <b>Source</b>                 |
|-------------------|-----------------|--------------------------------------------------------------------|-------------------------------|
| CD3               | 145-2C11        | PE.Cy7, biotin                                                     | Biolegend                     |
| CD4               | GK1.5           | FITC, PE, Pacific blue (PB),<br>Percp.Cy5.5                        | Biolegend                     |
| CD5               | 53-7.3          | PE                                                                 | eBioscience                   |
| CD8               | 53-6.7          | FITC, PE                                                           | BD Biosciences                |
| CD11b             | M1/70           | Alexa Fluor 700, 647                                               | Biolegend                     |
| CD11c             | HL3             | PE, PE.Cy7                                                         | BD Biosciences                |
| CD19              | ID3             | FITC, PE, APC, Percp.Cy5.5                                         | BD Biosciences                |
| CD21              | 4E3             | FITC, PE                                                           | eBioscience                   |
| CD23              | B3B4            | PE, biotin                                                         | Biolegend                     |
| CD24              | M1/69           | FITC, PE                                                           | BD Biosciences                |
| CD25              | PC61.5          | PE                                                                 | eBioscience                   |
| CD27              | LG.3A10         | PE, APC                                                            | BD Biosciences, Biolegend     |
| CD16/CD32         | 2.4G2           | PE                                                                 | BD Biosciences                |
| CD34              | RAM34           | PB                                                                 | eBioscience                   |
| B220              | RA3-6B2         | FITC, PE, APC, PB, APC.Cy7,<br>Alexa Fluor 700, biotin,<br>Qdot655 | BD Biosciences or invitrogen  |
| CD43              | S7              | PE                                                                 | BD Biosciences                |
| CD44              | IM7             | FITC, Alexa Fluor 700                                              | BD Biosciences                |
| CD71              | R17217          | PE                                                                 | eBioscience                   |
| CD115             | AFS98           | APC                                                                | Biolegend                     |
| CD117 (cKit)      | 2B8             | APC, APC.Cy7                                                       | BD Biosciences                |
| CD138             | 281-2           | PE                                                                 | Biolegend                     |
| Gr-1              | RB6-8C5         | PE.Cy7, PB, APC.Cy7, biotin                                        | BD Biosciences                |
| MHC II            | AF6-120.1       | Biotin                                                             | BD Biosciences                |
| Siglec H          | 551             | PB                                                                 | Biolegend                     |
| pDCA              | eBio927         | FITC, Percp-eFluor 710                                             | eBioscience                   |
| Ter119            | Ter-119         | Biotin                                                             | BD Biosciences                |
| IL-7R             | A7R34           | PE                                                                 | eBioscience                   |
| Ly6D              | 49-H4           | APC                                                                | BD Biosciences (self-labeled) |
| CD135(Flt3)       | A2F10           | PE.Cy5, BV421                                                      | eBioscience, Biolegend        |
| DX5               | DX5             | PE.Cy7                                                             | eBioscience                   |
| GL7               | GL-7            | FITC                                                               | BD Biosciences                |
| PNA               | -               | Biotin                                                             | Sigma-Aldrich                 |
| Sca-1             | E13-161.7 or D7 | FITC, Alexa Fluor 700                                              | BD Biosciences or eBioscience |
| AA4.1             | AA4.1           | PE                                                                 | BD Biosciences                |
| BP-1              | 6C3             | Biotin                                                             | BD Biosciences                |
| IgM               | II/41           | APC                                                                | BD Biosciences                |
| NK1.1             | PK136           | Percp.Cy5.5, biotin                                                | BD Biosciences                |
| FAS (CD95)        | Jo2             | PE                                                                 | BD Biosciences                |
| CD4               | RM4-5           | Percp.Cy5.5                                                        | eBioscience                   |
| Ly6C              | AL-21           | Biotin                                                             | BD Biosciences                |
| CD40              | 3/23            | biotin                                                             | BD Biosciences                |
| CD86              | GL1             | PE                                                                 | BD Biosciences                |
| CD150             | TC15-12F12.2    | APC                                                                | Biolegend                     |
